# Supplementary material for: Observation of hydroperoxyethyl formate from the reaction between the methyl Criegee intermediate and formic acid
Source: Royal Society of Chemistry journal article supplement (doi:10.1039/c9cp05030b), 2019-11-12
Supplement: c9cp05030b1.pdf [file c9cp05030b1.pdf]

# Electronic Supplementary Information

for

## Observation of Hydroperoxyethyl Formate from the Reaction between the Methyl Criegee Intermediate and Formic Acid

*Carlos Cabezas† and Yasuki Endo\**

Department of Applied Chemistry, Science Building II, National Chiao Tung  
University, 1001 Ta-Hsueh Rd., Hsinchu 30010, Taiwan

### AUTHOR INFORMATION

#### **Corresponding Author**

\* [endo@nctu.edu.tw](mailto:endo@nctu.edu.tw)

† Present Address: Instituto de Física Fundamental (IFF-CSIC), Group of Molecular  
Astrophysics, C/ Serrano 121, 28006 Madrid, Spain

## **Table of Contents**

**Table S1.** Comparison of between the theoretical and experimental rotational constants for the HPEF conformers.

**Table S2.** Optimized for *anti*-HPEF-I conformer.

**Table S3.** Optimized for *anti*-HPEF-II conformer.

**Table S4.** Optimized geometry for *syn*-HPEF-I conformer.

**Table S5.** Optimized for *syn*-HPEF-II conformer.

**Table S6.** Optimized geometry for the *syn*-PRC species.

**Table S7.** Optimized geometry for the *anti*-PRC species.

**Table S8.** Optimized geometry for TS-*syn* conformer.

**Table S9.** Optimized geometry for TS-*anti* conformer.

**Table S10.** Optimized geometry for VHP species.

**Table S11.** Observed transition frequencies for *anti*-HPEF-I conformer.

**Table S12.** Observed transition frequencies for *syn*-HPEF-I conformer.

**Table S13.** Observed transition frequencies for *anti*-d-HPEF-I conformer.

**Table S14.** Observed transition frequencies for *syn*-d-HPEF-I conformer.

**Table S1.** Comparison of between the theoretical and experimental rotational constants for the HPEF conformers.

***anti*-HPEF-I**

|                     | Th. parent <sup>a</sup> | Exp. parent <sup>b</sup> | Corr. Factor <sup>c</sup> | Rel.Error <sup>d</sup> | Th. d-iso <sup>e</sup> | Exp.d-iso <sup>f</sup> | Corrected <sup>g</sup> | Rel. Error <sup>d</sup> |
|---------------------|-------------------------|--------------------------|---------------------------|------------------------|------------------------|------------------------|------------------------|-------------------------|
| <b><i>A</i>/MHz</b> | 3590                    | <b>3557.66914</b>        | 1.0091                    | 0.909                  | 3507                   | <b>3475.24529</b>      | 3475.4166              | 0.914                   |
| <b><i>B</i>/MHz</b> | 2616                    | <b>2592.9501</b>         | 1.0089                    | 0.889                  | 2557                   | <b>2534.29754</b>      | 2534.469               | 0.896                   |
| <b><i>C</i>/MHz</b> | 1617                    | <b>1601.9461</b>         | 1.0094                    | 0.940                  | 1580                   | <b>1564.7546</b>       | 1565.290               | 0.974                   |

***syn*-HPEF-II**

|                     | Th. parent <sup>a</sup> | Exp. parent <sup>b</sup> | Corr. Factor <sup>c</sup> | Rel.Error <sup>d</sup> | Th. d-iso <sup>e</sup> | Exp.d-iso <sup>f</sup> | Corrected <sup>g</sup> | Rel. Error <sup>d</sup> |
|---------------------|-------------------------|--------------------------|---------------------------|------------------------|------------------------|------------------------|------------------------|-------------------------|
| <b><i>A</i>/MHz</b> | 3581                    | <b>3557.66914</b>        | 1.0007                    | 0.656                  | 3579                   | <b>3475.24529</b>      | 355.6822               | 2.986                   |
| <b><i>B</i>/MHz</b> | 2618                    | <b>2592.9501</b>         | 1.0097                    | 0.966                  | 2520                   | <b>2534.29754</b>      | 2495.8878              | -0.564                  |
| <b><i>C</i>/MHz</b> | 2036                    | <b>1601.9461</b>         | 1.2710                    | 27.095                 | 1976                   | <b>1564.7546</b>       | 1554.7375              | 26.281                  |

***syn*-HPEF-I**

|                     | Th. parent <sup>a</sup> | Exp. parent <sup>b</sup> | Corr. Factor <sup>c</sup> | Rel.Error <sup>d</sup> | Th. d-iso <sup>e</sup> | Exp.d-iso <sup>f</sup> | Corrected <sup>g</sup> | Rel. Error <sup>d</sup> |
|---------------------|-------------------------|--------------------------|---------------------------|------------------------|------------------------|------------------------|------------------------|-------------------------|
| <b><i>A</i>/MHz</b> | 4444                    | <b>4422.36894</b>        | 1.0049                    | 0.489                  | 4366                   | <b>4343.7883</b>       | 4344.7486              | 0.511                   |
| <b><i>B</i>/MHz</b> | 1908                    | <b>1889.58465</b>        | 1.0097                    | 0.975                  | 1855                   | <b>1836.7038</b>       | 1837.0962              | 0.996                   |
| <b><i>C</i>/MHz</b> | 1634                    | <b>1619.18028</b>        | 1.0091                    | 0.915                  | 1605                   | <b>1590.5154</b>       | 1590.4433              | 0.910                   |

***anti*-HPEF-II**

|                     | Th. parent <sup>a</sup> | Exp. parent <sup>b</sup> | Corr. Factor <sup>c</sup> | Rel.Error <sup>d</sup> | Th. d-iso <sup>e</sup> | Exp.d-iso <sup>f</sup> | Corrected <sup>g</sup> | Rel. Error <sup>d</sup> |
|---------------------|-------------------------|--------------------------|---------------------------|------------------------|------------------------|------------------------|------------------------|-------------------------|
| <b><i>A</i>/MHz</b> | 4254                    | <b>4422.36894</b>        | 0.9599                    | -4.010                 | 4146                   | <b>4343.7883</b>       | 4319.2324              | -4.553                  |
| <b><i>B</i>/MHz</b> | 1953                    | <b>1889.58465</b>        | 1.0335                    | 3.356                  | 1911                   | <b>1836.7038</b>       | 1848.9484              | 4.045                   |
| <b><i>C</i>/MHz</b> | 1529                    | <b>1619.18028</b>        | 0.9443                    | -5.570                 | 1501                   | <b>1590.5154</b>       | 1589.5288              | -5.628                  |

<sup>a</sup> Theoretical values for the parent species calculated at CCSD/aug-cc-pVTZ level of theory.

<sup>b</sup> Experimental values for the parent species. Green color means color that the values are well assigned to the predicted values. Red color means a hypothetical assignment.

<sup>c</sup> Corrected factor. It means the ratio:  $B_{th}/B_{exp}$ , where B is the rotational constant; *A*, *B* and *C*.

<sup>d</sup> Relative error calculated as follows:  $100 \cdot (B_{th}/B_{exp})/B_{exp}$ , where B is the rotational constant; *A*, *B* and *C*.

<sup>e</sup> Theoretical values for the deuterated isotopic species calculated at CCSD/aug-cc-pVTZ level of theory.

<sup>f</sup> Experimental values for the deuterated isotopic species. Green color means color that the values are well assigned to the predicted values. Red color means a hypothetical assignment.

<sup>g</sup> Values obtained using the corrected factor from the parent species and the theoretical values calculated at CCSD/aug-cc-pVTZ level of theory.

**Table S2.** Optimized geometry (xyz format, in Angstrom) at the CCSD/aug-cc-pVTZ level of theory for *anti*-HPEF-I conformer.

|   |          |          |          |
|---|----------|----------|----------|
| H | -0.12632 | -1.60333 | -0.91046 |
| O | -0.14668 | -1.96174 | -0.00677 |
| O | 0.52042  | -0.91494 | 0.71472  |
| C | -0.29474 | 0.21306  | 0.77656  |
| H | -1.31387 | -0.06547 | 0.51616  |
| C | -0.16155 | 0.83612  | 2.14346  |
| H | 0.89029  | 1.02470  | 2.35554  |
| H | -0.70808 | 1.77662  | 2.18221  |
| H | -0.55864 | 0.14937  | 2.88821  |
| O | 0.15244  | 1.23635  | -0.15365 |
| C | 0.12627  | 0.96959  | -1.45343 |
| H | 0.44326  | 1.84958  | -2.01812 |
| O | -0.19204 | -0.07154 | -1.97049 |

**Table S3.** Optimized geometry (xyz format, in Angstrom) at the CCSD/aug-cc-pVTZ level of theory for *anti*-HPEF-II conformer.

|   |          |          |          |
|---|----------|----------|----------|
| H | -1.61148 | -0.46139 | 1.84762  |
| O | -1.10651 | 0.34965  | 1.98458  |
| O | 0.21955  | -0.09689 | 1.66631  |
| C | 0.44734  | 0.19842  | 0.32702  |
| H | 0.11617  | 1.20790  | 0.09497  |
| C | 1.91540  | -0.02653 | 0.06258  |
| H | 2.18483  | -1.04888 | 0.32522  |
| H | 2.11882  | 0.14559  | -0.99252 |
| H | 2.50524  | 0.66770  | 0.65869  |
| O | -0.35749 | -0.72554 | -0.43567 |
| C | -0.66326 | -0.35172 | -1.68323 |
| H | -1.31597 | -1.10128 | -2.13953 |
| O | -0.28245 | 0.64490  | -2.23173 |

**Table S4.** Optimized geometry (xyz format, in Angstrom) at the CCSD/aug-cc-pVTZ level of theory for *syn*-HPEF-I conformer.

|   |          |          |          |
|---|----------|----------|----------|
| H | -0.97228 | -1.64793 | -1.31537 |
| O | -0.42317 | -1.05469 | -1.84096 |
| O | 0.63825  | -0.77564 | -0.91208 |
| C | 0.39594  | 0.46944  | -0.31893 |
| H | 1.29267  | 0.62511  | 0.27774  |
| C | 0.13732  | 1.59089  | -1.29426 |
| H | -0.79960 | 1.43155  | -1.82109 |
| H | 0.08873  | 2.53409  | -0.75176 |
| H | 0.95261  | 1.63385  | -2.01488 |
| O | -0.73997 | 0.38347  | 0.55167  |
| C | -0.50548 | -0.05269 | 1.80355  |
| H | -1.45184 | -0.09419 | 2.35027  |
| O | 0.56009  | -0.34178 | 2.26493  |

**Table S5.** Optimized geometry (xyz format, in Angstrom) at the CCSD/aug-cc-pVTZ level of theory for *syn*-HPEF-II conformer.

|   |          |          |          |
|---|----------|----------|----------|
| H | -1.57948 | -0.35254 | 0.34411  |
| O | -1.32686 | -0.16368 | 1.26508  |
| O | -0.34440 | 0.86078  | 1.06340  |
| C | 0.84226  | 0.34565  | 0.55641  |
| H | 1.60011  | 1.04710  | 0.89827  |
| C | 1.17312  | -1.07496 | 0.94951  |
| H | 0.49516  | -1.78489 | 0.48408  |
| H | 2.19409  | -1.29151 | 0.63836  |
| H | 1.09358  | -1.17374 | 2.03052  |
| O | 0.94370  | 0.50491  | -0.89406 |
| C | -0.00170 | 0.04806  | -1.70115 |
| H | 0.28952  | 0.22555  | -2.73935 |
| O | -1.04107 | -0.48109 | -1.39230 |

**Table S6.** Optimized geometry (xyz format, in Angstrom) at the CCSD/aug-cc-pVTZ level of theory for the *syn*-PRC species.

|   |          |          |          |
|---|----------|----------|----------|
| O | -1.41775 | -0.33497 | -0.69366 |
| O | -0.65087 | 0.77532  | -1.08421 |
| C | 0.47810  | 0.50266  | -1.53796 |
| H | 1.05208  | 1.38897  | -1.78466 |
| C | 0.95391  | -0.87116 | -1.76682 |
| H | 0.19844  | -1.40460 | -2.34635 |
| H | 1.91568  | -0.86156 | -2.27152 |
| H | 1.03067  | -1.37052 | -0.80188 |
| O | 1.23706  | 0.26189  | 1.10941  |
| C | 0.44602  | 0.02558  | 1.99839  |
| H | 0.72971  | 0.05144  | 3.05503  |
| O | -0.82028 | -0.28683 | 1.85453  |
| H | -1.07204 | -0.31346 | 0.88065  |



**Table S7.** Optimized geometry (xyz format, in Angstrom) at the CCSD/aug-cc-pVTZ level of theory for the *anti*-PRC species.

|   |          |          |          |
|---|----------|----------|----------|
| O | 0.22123  | -1.78904 | -0.06514 |
| O | -0.37250 | -0.91037 | -1.01605 |
| C | 0.35751  | 0.04786  | -1.32975 |
| H | 1.37083  | 0.04759  | -0.94946 |
| C | -0.14802 | 1.06244  | -2.27820 |
| H | -1.19181 | 0.88166  | -2.52017 |
| H | -0.02848 | 2.04189  | -1.81664 |
| H | 0.45983  | 1.03302  | -3.18463 |
| O | 0.14208  | 1.36927  | 0.69831  |
| C | -0.05520 | 0.85035  | 1.78571  |
| H | -0.19188 | 1.45697  | 2.68574  |
| O | -0.13328 | -0.42240 | 2.03950  |
| H | 0.00553  | -0.99229 | 1.19065  |

**Table S8.** Optimized geometry (xyz format, in Angstrom) at the CCSD/aug-cc-pVTZ level of theory for TS-*syn* conformer.

|   |          |          |          |
|---|----------|----------|----------|
| O | -2.85726 | -0.51973 | -1.42526 |
| O | -1.16868 | 1.48751  | -2.04179 |
| C | 1.10969  | 0.84822  | -2.31540 |
| H | 2.32642  | 2.47108  | -2.61596 |
| C | 2.01565  | -1.73865 | -2.81113 |
| H | 1.68241  | -2.11093 | -4.82394 |
| H | 4.03028  | -1.85999 | -2.43824 |
| H | 0.96654  | -3.13119 | -1.73740 |
| O | 2.26696  | 0.67165  | 1.89241  |
| C | 0.69980  | 0.03164  | 3.48414  |
| H | 1.22537  | 0.00495  | 5.48952  |
| O | -1.61568 | -0.66288 | 3.11893  |
| H | -2.21813 | -0.64692 | 1.17288  |

**Table S9.** Optimized geometry (xyz format, in Angstrom) at the CCSD/aug-cc-pVTZ level of theory for TS-*anti* conformer.

|   |          |          |          |
|---|----------|----------|----------|
| O | 0.35713  | -3.47683 | 0.27995  |
| O | -0.67704 | -1.85236 | -1.58525 |
| C | 0.66347  | -0.00761 | -2.25766 |
| H | 2.63383  | 0.01812  | -1.72383 |
| C | -0.25803 | 1.72732  | -4.19952 |
| H | -2.25954 | 1.46888  | -4.55574 |
| H | 0.14066  | 3.64357  | -3.59500 |
| H | 0.78446  | 1.32453  | -5.95875 |
| O | 0.24631  | 2.65571  | 0.82401  |
| C | -0.14800 | 1.83376  | 2.99208  |
| H | -0.44360 | 3.19466  | 4.52556  |
| O | -0.17911 | -0.47136 | 3.65709  |
| H | 0.08952  | -2.04953 | 2.16362  |

**Table S10.** Optimized geometry (xyz format, in Angstrom) at the CCSD/aug-cc-pVTZ level of theory for VHP species.

|   |          |          |          |
|---|----------|----------|----------|
| H | -0.67896 | -0.83524 | -1.58219 |
| O | -0.59473 | 0.06345  | -1.24158 |
| O | 0.68888  | -0.00528 | -0.61343 |
| C | 0.54710  | -0.00042 | 0.74803  |
| C | -0.57343 | -0.00660 | 1.46077  |
| H | 1.53826  | 0.01348  | 1.18081  |
| H | -0.49053 | -0.00114 | 2.53618  |
| H | -1.54946 | -0.01676 | 1.00561  |

**Table S11.** Observed transition frequencies for *anti*-HPEF-I conformer.

| $J'$ | $K_a'$ | $K_c'$ | $J''$ | $K_a''$ | $K_c''$ | $\nu_{\text{obs.}}$ | $\nu_{\text{obs.}} - \nu_{\text{cal.}}$ |
|------|--------|--------|-------|---------|---------|---------------------|-----------------------------------------|
| 3    | 0      | 3      | 2     | 1       | 2       | 10708.502           | 0.000                                   |
| 3    | 1      | 2      | 2     | 2       | 1       | 10772.866           | 0.000                                   |
| 3    | 1      | 3      | 2     | 1       | 2       | 10851.025           | 0.000                                   |
| 3    | 0      | 3      | 2     | 0       | 2       | 11149.288           | 0.000                                   |
| 3    | 1      | 3      | 2     | 0       | 2       | 11291.811           | 0.000                                   |
| 2    | 1      | 1      | 1     | 0       | 1       | 11336.496           | 0.000                                   |
| 2    | 2      | 1      | 1     | 1       | 0       | 12274.920           | -0.001                                  |
| 3    | 2      | 2      | 2     | 2       | 1       | 12584.638           | -0.001                                  |
| 2    | 2      | 0      | 1     | 1       | 0       | 12741.987           | 0.000                                   |
| 2    | 2      | 1      | 1     | 1       | 1       | 13265.921           | 0.000                                   |
| 3    | 1      | 2      | 2     | 1       | 1       | 13667.010           | -0.001                                  |
| 2    | 2      | 0      | 1     | 1       | 1       | 13732.989           | 0.001                                   |
| 3    | 2      | 1      | 2     | 2       | 0       | 14019.999           | 0.000                                   |
| 4    | 0      | 4      | 3     | 1       | 3       | 14123.995           | 0.000                                   |
| 4    | 1      | 4      | 3     | 1       | 3       | 14161.787           | 0.001                                   |
| 4    | 0      | 4      | 3     | 0       | 3       | 14266.519           | 0.000                                   |
| 4    | 1      | 4      | 3     | 0       | 3       | 14304.310           | 0.000                                   |
| 3    | 2      | 2      | 2     | 1       | 1       | 15478.782           | -0.001                                  |
| 4    | 1      | 3      | 3     | 2       | 2       | 15542.276           | 0.000                                   |
| 4    | 2      | 3      | 3     | 2       | 2       | 16395.578           | 0.000                                   |
| 3    | 1      | 2      | 2     | 0       | 2       | 17080.793           | 0.000                                   |
| 4    | 1      | 3      | 3     | 1       | 2       | 17354.050           | 0.001                                   |
| 3    | 2      | 1      | 2     | 1       | 1       | 17381.210           | 0.000                                   |
| 5    | 0      | 5      | 4     | 1       | 4       | 17391.962           | -0.001                                  |
| 5    | 1      | 5      | 4     | 1       | 4       | 17400.962           | 0.001                                   |
| 5    | 0      | 5      | 4     | 0       | 4       | 17429.751           | -0.002                                  |
| 5    | 1      | 5      | 4     | 0       | 4       | 17438.752           | 0.001                                   |
| 4    | 2      | 3      | 3     | 1       | 2       | 18207.351           | 0.000                                   |

**Table SX12.** Observed transition frequencies for *syn*-HPEF-I conformer.

| $J'$ | $K_a'$ | $K_c'$ | $J''$ | $K_a''$ | $K_c''$ | $\nu_{\text{obs.}}$ | $\nu_{\text{obs.}} - \nu_{\text{cal.}}$ |
|------|--------|--------|-------|---------|---------|---------------------|-----------------------------------------|
| 2    | 1      | 1      | 1     | 0       | 1       | 10091.032           | 0.001                                   |
| 4    | 0      | 4      | 3     | 1       | 2       | 10268.889           | 0.001                                   |
| 4    | 0      | 4      | 3     | 1       | 3       | 11890.140           | 0.000                                   |
| 3    | 1      | 3      | 2     | 0       | 2       | 12391.152           | 0.000                                   |
| 5    | 0      | 5      | 4     | 1       | 3       | 12902.055           | 0.000                                   |
| 4    | 1      | 4      | 3     | 1       | 3       | 13455.796           | -0.001                                  |
| 4    | 0      | 4      | 3     | 0       | 3       | 13836.401           | 0.000                                   |
| 3    | 1      | 2      | 2     | 0       | 2       | 14012.403           | 0.000                                   |
| 4    | 1      | 3      | 3     | 1       | 2       | 14531.325           | -0.001                                  |
| 2    | 2      | 1      | 1     | 1       | 0       | 14886.132           | -0.001                                  |
| 2    | 2      | 0      | 1     | 1       | 0       | 14906.642           | 0.000                                   |
| 2    | 2      | 1      | 1     | 1       | 1       | 15156.519           | 0.000                                   |
| 2    | 2      | 0      | 1     | 1       | 1       | 15177.029           | 0.000                                   |
| 4    | 1      | 4      | 3     | 0       | 3       | 15402.055           | -0.001                                  |
| 5    | 0      | 5      | 4     | 1       | 4       | 15598.835           | 0.000                                   |
| 4    | 1      | 3      | 3     | 0       | 3       | 18098.838           | 0.001                                   |
| 3    | 2      | 2      | 2     | 1       | 1       | 18124.398           | 0.000                                   |
| 3    | 2      | 1      | 2     | 1       | 1       | 18226.164           | 0.000                                   |
| 5    | 1      | 5      | 4     | 0       | 4       | 18352.983           | 0.000                                   |

**Table S13.** Observed transition frequencies for *anti*-d-HPEF-I conformer.

| $J'$ | $K_a'$ | $K_c'$ | $J''$ | $K_a''$ | $K_c''$ | $\nu_{\text{obs.}}$ | $\nu_{\text{obs.}} - \nu_{\text{cal.}}$ |
|------|--------|--------|-------|---------|---------|---------------------|-----------------------------------------|
| 3    | 1      | 3      | 2     | 0       | 2       | 11029.812           | -0.005                                  |
| 2    | 2      | 1      | 1     | 1       | 0       | 11990.457           | -0.001                                  |
| 2    | 2      | 1      | 1     | 1       | 1       | 12960.001           | 0.004                                   |
| 2    | 2      | 0      | 1     | 1       | 1       | 13417.742           | -0.002                                  |
| 4    | 0      | 4      | 3     | 1       | 3       | 13797.738           | -0.002                                  |
| 4    | 1      | 4      | 3     | 0       | 3       | 13972.824           | -0.001                                  |
| 3    | 2      | 2      | 2     | 1       | 1       | 15119.937           | 0.000                                   |
| 5    | 0      | 5      | 4     | 1       | 4       | 16989.501           | 0.002                                   |
| 5    | 1      | 5      | 4     | 0       | 4       | 17034.834           | 0.003                                   |

**Table S14.** Observed transition frequencies for *syn*-d-HPEF-I conformer.

| $J'$ | $K_a'$ | $K_c'$ | $J''$ | $K_a''$ | $K_c''$ | $F'$ | $F''$ | $\nu_{\text{obs.}}$ | $\nu_{\text{obs.}} - \nu_{\text{cal.}}$ |
|------|--------|--------|-------|---------|---------|------|-------|---------------------|-----------------------------------------|
| 3    | 1      | 3      | 2     | 0       | 2       | 2    | 1     | 12180.027           | -0.004                                  |
|      |        |        |       |         |         | 4    | 3     | 12180.048           | 0.002                                   |
|      |        |        |       |         |         | 3    | 2     | 12180.057           | 0.003                                   |
| 3    | 1      | 2      | 2     | 0       | 2       | 2    | 1     | 13656.195           | -0.003                                  |
|      |        |        |       |         |         | 4    | 3     | 13656.217           | -0.001                                  |
|      |        |        |       |         |         | 3    | 2     | 13656.238           | 0.002                                   |
| 2    | 2      | 0      | 1     | 1       | 0       | 3    | 2     | 14638.978           | 0.007                                   |
|      |        |        |       |         |         | 1    | 0     | 14638.988           | 0.002                                   |
|      |        |        |       |         |         | 2    | 1     | 14639.001           | 0.002                                   |
| 2    | 2      | 1      | 1     | 1       | 1       | 3    | 2     | 14867.889           | -0.003                                  |
|      |        |        |       |         |         | 2    | 1     | 14867.931           | 0.002                                   |
| 2    | 2      | 0      | 1     | 1       | 1       | 3    | 2     | 14885.136           | -0.004                                  |
|      |        |        |       |         |         | 2    | 1     | 14885.176           | -0.003                                  |
| 4    | 1      | 4      | 3     | 0       | 3       | 5    | 4     | 15150.939           | -0.004                                  |
|      |        |        |       |         |         | 3    | 2     | 17607.069           | -0.001                                  |
|      |        |        |       |         |         | 5    | 4     | 17607.087           | 0.007                                   |
| 3    | 2      | 1      | 2     | 1       | 1       | 2    | 1     | 17888.340           | 0.003                                   |
|      |        |        |       |         |         | 4    | 3     | 17888.361           | 0.008                                   |
|      |        |        |       |         |         | 3    | 2     | 17888.379           | 0.000                                   |
| 3    | 2      | 2      | 2     | 1       | 2       | 2    | 1     | 18541.138           | -0.003                                  |
|      |        |        |       |         |         | 4    | 3     | 18541.158           | -0.003                                  |
|      |        |        |       |         |         | 3    | 2     | 18541.188           | -0.009                                  |
